# Supplementary material for: Eigengene networks for studying the relationships between co-expression modules
Source: Springer Nature journal article supplement (doi:10.1186/1752-0509-1-54), 2007-11-21

## A. Single eigengene network analysis

### Construct network

Rationale: make use of interaction patterns between genes

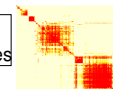

### Identify modules

Tools: Hierarchical clustering  
Rationale: module- (pathway-) based analysis

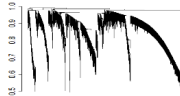

### Find one representative for each module

Tools: eigengene (1st Principal Component)  
Rationale: Condense each module into one profile

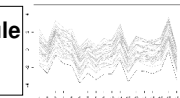

### Create network of representatives

Tools: Correlation of eigengenes  
Rationale: Study relationships between pathways

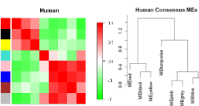

## B. Differential analysis of eigengene networks.

### Construct networks for each dataset

Rationale: make use of interaction patterns between genes

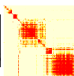

### Identify consensus modules

Tools: consensus dissimilarity clustering  
Rationale: find preserved modules

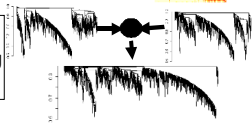

### Construct eigengene networks in each dataset

Tools: eigengene as module representative  
Rationale: quantify relationships *between* pathways

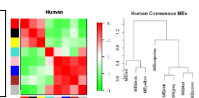

### Compare eigengene networks across sets

Tools: Measures of correlation preservation  
Rationale: understand which biological conditions affect the relationships between modules

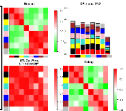

## C. Expression levels of genes and eigengene

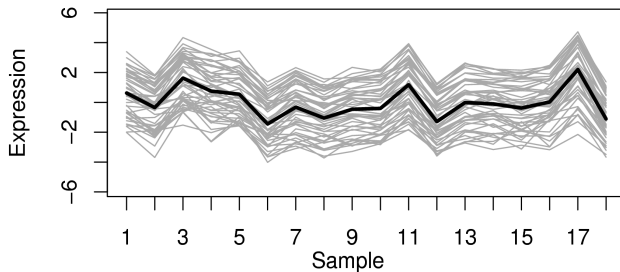

## D. Module expression heatmap

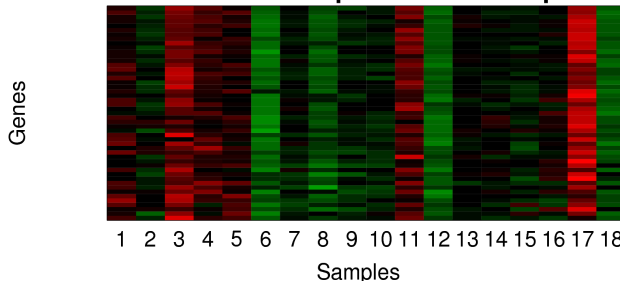

## E. Eigengene Expression

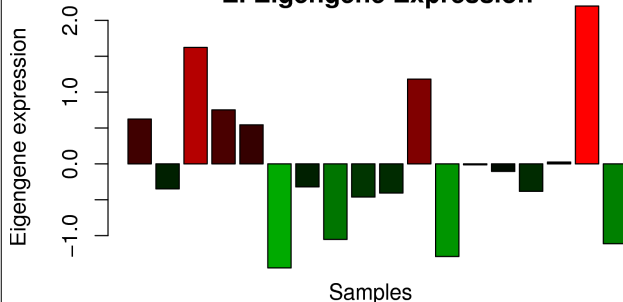

Supplement: 12918_2007_54_MOESM8_ESM.pdf [file 12918_2007_54_MOESM8_ESM.pdf]
